**Muscle mitochondrial volume and aerobic capacity in a small marsupial (*Sminthopsis crassicaudata*) match those of ‘athletic’ placentals, reflecting flexible links between energy-use levels in mammals generally.**

Terence J Dawson<sup>1,2</sup>, Koa N Webster<sup>1,3\*</sup>, Enhua Lee<sup>1</sup> and William A. Buttemer<sup>2,4</sup>.

<sup>1</sup>School of Biological, Earth and Environmental Sciences, University of New South Wales, Sydney, NSW 2052, Australia, <sup>2</sup>School of Biological Sciences, University of Wollongong, Wollongong, NSW 2522, Australia, <sup>3</sup>Department of Biological Sciences, Faculty of Science, Macquarie University, Sydney, NSW 2109, Australia, and <sup>4</sup>Centre for Integrative Ecology, Deakin University, Geelong, VIC 3217, Australia.

\* Author for correspondence (koa.webster@mq.edu.au)

Running head: High aerobic capability of marsupials.

Key words: aerobic capacity, basal metabolism, exercise, field metabolism, maximum metabolism, mitochondria.

## 1 SUMMARY

2 We investigated the muscle structure/function relationships that underlie the aerobic capacity of  
 3 an insectivorous, small (~15 g) marsupial, *Sminthopsis crassicaudata* (Family: Dasyuridae).  
 4 This was for further insight into energy use patterns in marsupials, relative to those in placentals,  
 5 their sister clade within the Theria (advanced mammals). Disparate hopping marsupials  
 6 (Suborder Macropodiformes), a kangaroo (*Macropus rufus*) and a rat-kangaroo (*Bettongia*  
 7 *penicillata*), show aerobic capabilities as high as those of ‘athletic’ placentals. Equivalent  
 8 muscle mitochondrial volumes and cardiovascular features support these capabilities. We  
 9 examined *S. crassicaudata* to determine whether highly developed aerobic capabilities occur  
 10 elsewhere in marsupials, rather than being restricted to the more recently evolved  
 11 Macropodiformes. This was the case. Treadmill-trained *S. crassicaudata* attained a maximal  
 12 aerobic metabolic rate ( $\dot{V}O_{2\max}$  or MMR) of  $272 \text{ mlO}_2 \text{ min}^{-1} \text{ kg}^{-1}$  (N=8), similar to that reported  
 13 for a small (~20g), ‘athletic’ placental, *Apodemus sylvaticus*,  $264 \text{ mlO}_2 \text{ min}^{-1} \text{ kg}^{-1}$ . Hopping  
 14 marsupials have comparable aerobic levels when body mass variation is considered. *S.*  
 15 *crassicaudata* has a basal metabolic rate (BMR) about 75% of placental values but it has a  
 16 notably large factorial aerobic scope (fAS) of 13; elevated fAS also feature in hopping  
 17 marsupials. The  $\dot{V}O_{2\max}$  of *S. crassicaudata* was supported by an elevated total muscle  
 18 mitochondrial volume, which was largely achieved through high muscle mitochondrial volume  
 19 densities,  $V_v(\text{mt}, \text{f})$ , the mean value being  $14.0 \pm 1.33\%$ . These data were considered in relation  
 20 to energy use levels in mammals, particularly field metabolic rate (FMR). BMR is consistently  
 21 lower in marsupials, but this is balanced out by a high fAS, such that marsupial MMR matches  
 22 that of placentals. However, FMR shows different mass relationships in the two clades, with the  
 23 FMR of small (<125 g) marsupials, such as *S. crassicaudata*, being higher than in comparably  
 24 sized placentals with the reverse applying for larger marsupials. The flexibility of energy output  
 25 in marsupials provides explanations for this pattern. Overall our data refute widely held notions  
 26 of mechanistically closely linked relationships between body mass, BMR, FMR and MMR in  
 27 mammals generally.

28

29

## 30 INTRODUCTION

31 Marsupials (Metatheria) are the sister clade of placentals (Eutheria). Together they  
 32 comprise the Theria or advanced mammals and they have many anatomical and  
 33 physiological characteristics in common, which largely reflect ancestral traits that evolved  
 34 prior to the divergence of these two groups about 148 MYA (Bininda-Emonds et al. 2007).  
 35 Differences between the two groups, such as their distinct reproductive features, reflect  
 36 divergent evolutionary trajectories during their long, separate histories. Another area  
 37 where differences seem to have occurred concerns metabolic patterns. Marsupials have  
 38 relatively low basal metabolic rates (BMR), generally about 75% of placental values, and  
 39 historically were seen as being less competent at thermoregulation and also ‘low energy’  
 40 mammals (Martin, 1902; Dawson, 1973). While distinctions regarding the thermal biology  
 41 of these clades have been long discarded (Dawson, 1973; Dawson, 1989) debate about  
 42 differences in metabolic capabilities of marsupials has persisted in some disciplines (e.g.  
 43 McNab, 1980; McNab, 2005). Here we expand investigations of the aerobic capacities of  
 44 marsupials and also focus on the functional structures that underlie the capacity for oxygen  
 45 use in their muscles. We wish to put these into perspective relative to the features that have  
 46 recently been established for the structure/function relationships underlying the aerobic  
 47 capacities of the placental mammals (Weibel et al., 2004).

48         It has become apparent that some marsupials have substantial aerobic capabilities  
 49 that result from relatively large factorial aerobic scopes (fAS), such that they achieve  
 50 levels of maximum oxygen consumption ( $\dot{V}O_{2\max}$ ) similar to those seen in placentals  
 51 (Dawson and Dawson, 1982; Hinds et al., 1993). Recent data for the red kangaroo,  
 52 *Macropus rufus*, (Family Macropodidae) (Kram and Dawson, 1998; Dawson et al., 2004)

53 are notable because, despite a relatively low BMR, its extreme fAS of 54 results in a  $\dot{V}$   
 54  $O_{2\max}$  or maximum metabolic rate (MMR) equivalent to the high levels reported in a  
 55 group of placental mammals, such as dogs and horses, that were categorised as ‘athletic’  
 56 (Taylor et al., 1987; Weibel et al., 2004). Underlying this capability in *M. rufus* is a large  
 57 mass of locomotor muscles that have comparatively high mitochondrial and capillary  
 58 volumes (Dawson et al., 2004). Another hopping marsupial, *Bettongia penicillata*, a rat-  
 59 kangaroo (Family Potoroidae), though much smaller, body mass ( $M_b$ ) 1 kg, also shows an  
 60 elevated fAS of 23 and a markedly high MMR (Seeherman et al., 1981; Webster and  
 61 Dawson, 2012). Again this is associated with a large skeletal muscle mass that has

relatively high muscle mitochondrial volume densities and both a large total capillary volume and total capillary erythrocyte volume (Webster and Dawson, 2012). Overall, the muscle and cardio-respiratory structural features of *M. rufus* and *B. penicillata* are identical to those reported for ‘athletic’ placental mammals of equivalent sizes by Weibel and co-workers (Weibel et al., 2004). Notably, the ratio between MMR and total muscle mitochondrial volume ( $\sim 5 \text{ ml O}_2 \text{ min}^{-1} \text{ ml}^{-1}$ ) is, as initially proposed (Hoppeler and Lindstedt, 1985), consistent in placentals (Weibel et al., 2004) and macropodiform marsupials (Webster and Dawson, 2012).

*M. rufus* and *B. penicillata* belong to the specialised monophyletic suborder Macropodiformes (kangaroos, wallabies and rat-kangaroos) (Meredith et al., 2008), but do they differ aerobically from other marsupials? Evidence for ‘athletic’ level aerobic capacities in other marsupials is strong and comes from disparate studies of their cardio-respiratory features (e.g. Dawson and Needham, 1981; Hallam et al., 1989; Hallam et al., 1995; Agar et al., 2000; Dawson et al., 2003). The generality of this assertion is not certain because, while Hinds et al. (1993) measured comparatively high fAS during locomotion for several smaller species of marsupial, their reported MMR values did not reach ‘athletic’ placental levels. However, the MMR value obtained by Hinds et al. (1993) for *B. penicillata* was lower than those obtained on more extensively trained animals (Seeherman et al., 1981; Webster and Dawson, 2012). The only other marsupial for which comparable data are available is a South American opossum, *Monodelphis domestica* (Family: Didephidae) ( $M_b \sim 90 \text{ g}$ ). It also has a comparatively large fAS (Dawson and Olson, 1988; Schaeffer et al., 2003) but its MMR does not reach an ‘athletic’ level, though the mitochondrial volume densities of its skeletal muscles are not lower than generally seen in similar sized placentals (Schaeffer et al., 2003). On the other hand, there is support for relatively high aerobic capabilities extending to smaller marsupials. This comes from studies of field metabolic rates (FMR). Marsupials and placentals show distinctly different patterns of variation of FMR with  $M_b$ , but intriguingly, small marsupials ( $M_b < 125 \text{ g}$ ) have higher FMRs than placentals of similar size (Nagy et al., 1999; Capellini et al., 2010). These differences are particularly marked among the smallest marsupials; at a  $M_b$  of  $\sim 15 \text{ g}$  the FMR of *Sminthopsis crassicaudata* is almost double that of the predicted placental value (Nagy, 1988).

To clarify the factors underlying this disparity and to further our understanding of the metabolic patterns and aerobic capabilities among small marsupial species from different phylogenetic clades, we studied *S. crassicaudata* (Family: Dasyuridae). This species ( $M_b \sim 15 \text{ g}$ ) is an active, quadrupedal insectivore that has often been used as a model for Australian dasyurid

95 marsupials and was among the species examined by Hinds et al. (1993). We focused first on  
 96 gaining an accurate determination of its MMR and then determined how it related to its muscle  
 97 content and muscle mitochondrial features such as volume density. Because of its high MMR  
 98 levels, we predicted that it would share characteristics that match what has previously been  
 99 found in the Macropodiformes, thereby indicating a generally higher aerobic capability among  
 100 marsupials that matches that seen in placentals designated as ‘athletic’ by Weibel et al. (2004). If  
 101 so, it would point to a fundamental structure/function relationship for oxygen delivery to  
 102 muscles evolving in or before the earliest mammals. Further, such information provides the  
 103 opportunity to examine the presumed relationships between BMR, MMR and FMR in mammals.  
 104 This is significant in view of the idea that BMR is a good predictor of energy budgets, which is  
 105 based on the notion that the allometric relationship between  $M_b$  and BMR locks in other  
 106 metabolic levels (West et al., 1997; West et al., 1999; Brown et al., 2004).

## 108 MATERIALS AND METHODS

### 109 Animals and animal care

110 Fat-tailed dunnarts, *Sminthopsis crassicaudata* (Gould, 1844) of the Family Dasyuridae  
 111 (Krajewski et al., 2012) are mouse-sized insectivorous marsupials that inhabit the surface  
 112 of open habitats, usually in semi-arid and arid regions of Australia. They are active  
 113 nocturnal predators, catching relatively large, invertebrate prey, such as crickets and  
 114 beetles (Morton 1978). Our investigations were in two parts. 1) An analysis of  
 115 mitochondrial characteristics of locomotor muscles of *S. crassicaudata* was made at the  
 116 University of New South Wales, Sydney. The animals used in this study were derived  
 117 from colonies maintained at the University of Adelaide and University of Wollongong. 2)  
 118 A study of aerobic capacity of *S. crassicaudata* during running that was undertaken at the  
 119 University of Wollongong, using animals from their breeding colony that was established  
 120 3 years earlier from free-living animals collected in western Queensland.

121 During investigation and prior to killing, animals were kept at an air temperature  
 122 ( $T_a$ ) of  $23 \pm 0.4^\circ\text{C}$ , with a 12 hour light: dark cycle, the lights switching on at 0600 hours.  
 123 They were housed individually in clear plastic containers (55 x 38 x 20cm), which were  
 124 fitted with wire tops; bedding of straw and shredded paper was provided. A mixture of  
 125 dried cat food (moistened) and canned dog food was provided ad libitum; this was  
 126 supplemented with live crickets and vitamin drops (Pentavite infant vitamins). Water was  
 127 available at all times.

128

129 **Muscle sample collection and preparation**

130 To assess the muscle mitochondrial parameters of the skeletal muscle of the whole  
 131 body we followed a sampling procedure comparable to that developed by Hoppeler et al.  
 132 (1984) and used in other studies of marsupials (Dawson et al., 2004; Webster and Dawson,  
 133 2012). The musculature of *S. crassicaudata* was divided into five functional regions, these  
 134 being head/neck, fore leg, trunk, hind leg and tail. Animals were killed by gassing (carbon  
 135 dioxide) and weighed to the nearest 0.01 g on an electronic balance (Sartorius AG,  
 136 Goettingen, Germany) directly before dissection. Four animals were dissected to estimate  
 137 total skeletal muscle mass and the proportions of muscle in the five body regions. The  
 138 contributions to body mass of skin, heart and the digestive tract were also determined. In a  
 139 further five animals the heart plus seven skeletal muscles, including the diaphragm because  
 140 of its role in ventilation, were then dissected out and small blocks sampled for electron  
 141 microscopy. The skeletal muscles used were randomly selected, one coming from each  
 142 region except the hind leg where two muscles were selected. These were, m. trapezius  
 143 (head/neck), m. deltoid (fore limb), m. pectoralis minor (trunk), m. multifidi lumborum  
 144 (trunk), m. gluteus maximus and m. quadriceps (hind leg), m. multifidi lumborum (tail).

145 Two small blocks, no greater than 2mm thick, were randomly cut from each muscle  
 146 whilst being bathed in a drop of cold glutaraldehyde fixative solution (2.5% in 0.1M  
 147 sodium cacodylate buffer, pH 7.4). Sample blocks were transferred to vials containing the  
 148 buffered glutaraldehyde fixative solution for proper immersion fixation for a minimum of  
 149 four hours. Sample preparation thereafter followed the method of previous studies  
 150 (Dawson et al., 2004, Webster and Dawson, 2012), with the blocks ultimately being  
 151 embedded into Spurr's resin (a slow cure, low viscosity epoxy) over a long infiltration  
 152 period (3-4 days) and cured at 60°C for 48h. Ultra-thin sections of approximately 60 – 80  
 153 nm were cut for each muscle sample using glass knives mounted on a Reichert-Jung  
 154 Ultracut microtome (Leica Microsystems, Vienna, Austria). The sections were placed onto  
 155 copper grids (200 square mesh) and were immediately stained with uranyl acetate in 50%  
 156 ethanol for ten minutes.

157

158 **Mitochondrial volume and inner mitochondrial membrane surface area**

159 Grids were viewed at 10,000 x magnification with either a Hitachi 7000 (Tokyo,  
 160 Japan) or JEOL 1400 (Tokyo, Japan) transmission electron microscope (TEM). Ten grid

squares were selected per sample block using a systematic random sampling method (Howard and Reed, 1998). Digital micrographs were taken in the top left corner of the grid squares using an Olympus SQ (Tokyo, Japan) digital camera and software package AnalySIS (attached to the Hitachi 7000 TEM) or a Gatan (Pleasanton, CA, USA) digital camera and software package Gatan Digital Micrograph (attached to the JEOL 1400). For each animal, a total of 160 micrographs were taken (ten micrographs per block x two blocks per muscle x eight muscles).

Mitochondrial volumes were determined using the methods of previous studies (Dawson et al., 2004 and Webster and Dawson, 2012). Briefly, mitochondria were identified and selected in digital images by a human operator. The total percentage area covered by the mitochondria (mitochondrial area fraction) in each micrograph was estimated using either an image processing plug-in to Adobe Photoshop (Adobe Systems Inc, San Jose, CA, USA) or the software ImageJ (US National Institutes of Health, Bethesda, MA, USA). According to the Delesse principle, the mitochondrial volume fraction  $V_v(mt,f)$ , often referred to as mitochondrial volume density, is equivalent to the mitochondrial area fraction (Weibel, 1980; Howard and Reed, 1998). The total mitochondrial volume  $V(mt,m)$  for each muscle region (in ml) was calculated from:

$$V(mt,m) = M_m \times V_v(mt,f) \times V_v(f,m) \times d^{-1} \quad (1)$$

where  $M_m$  is regional muscle mass,  $V_v(mt,f)$  is the volume fraction of mitochondria,  $V_v(f,m)$  is the volume fraction of muscle occupied by muscle fibres, and  $d$  is the density of the muscle. For this study, it was assumed that  $V_v(f,m)$  was equal to 1 (Hoppeler et al., 1987) and that  $d$  was equal to  $1.06 \text{ g ml}^{-3}$  (Mendez and Keys, 1960) since the myofibril fraction and density are considered constant in all muscles (Mendez and Keys, 1960; Barth et al., 1992).

The surface density of the inner mitochondrial membranes was estimated in four muscles (m. gluteus maximus, m. deltoid, heart and diaphragm). For each animal, a total of 40 mitochondria (five mitochondria per block x two blocks per muscle x four muscles) were examined and micrographs taken at up to 40,000 x magnification (using the Hitachi 7000 TEM with attached Olympus digital camera). The surface density of inner mitochondrial membranes per unit volume of mitochondria,  $S_v(im,mt)$ , was estimated using the same method as previous studies (Dawson et al., 2004 and Webster and Dawson, 2012). An overall estimation of the total surface area of inner membranes in each muscle was given by:

$$S(im,m) = V(mt,m) \times Sv(im,mt). \quad (2)$$

## Aerobic capacity

To ensure that maximum aerobic capacity (MMR) was achieved we followed the procedures of Seeherman et al. (1981); such procedures were used in comparable studies on placental mammals (see Weibel et al., 2004). The essence of these procedures was extensive treadmill training (running) that ensured an accurate and reproducible MMR. Seeherman et al. (1981) found that at least 2 – 6 weeks of training were needed for this to be achieved for most of the species that they investigated. We trained *S. crassicaudata* for treadmill running for 6 – 8 weeks by exercising them at speeds up to  $1.5 \text{ m s}^{-1}$ , generally on alternate days. The highest training speed at which an animal could maintain 5 min of constant running, following an initial speed adjustment period of 30 s, was used during the measurement of MMR; such speeds ranged between 1 and  $1.5 \text{ m s}^{-1}$ . The MMR obtained was the highest 2-min period of *instantaneous oxygen consumption* when an animal ran for at least 5 min. The method for obtaining instantaneous oxygen consumption (Bartholomew et al., 1981) involved initially determining the washout characteristics of the chamber, at the flow rate used, by tracking the dynamics of a sudden pulse of  $\text{O}_2$  depleted air followed by immediate return to room air.

For actual measurement a *S. crassicaudata* was contained within an inverted 1.2 l rectangular plastic container on a stationary treadmill belt. The treadmill speed was then adjusted to that required, ie. the highest training speed for that individual. A constant airflow of  $2.0 \text{ l min}^{-1}$  was aspirated through the container at all treadmill speeds. Air entered through two small holes in the front of the chamber and also through the bottom edges of the chamber in contact with the belt. Flow rate was monitored with a Sierra Top-Trak mass-flow meter (Sierra, Monterey, CA, USA). Oxygen content of inlet and outlet air was measured using a Sable Systems FC-1 oxygen analyser (Las Vegas, NV, USA), with detection sensitivity of 0.0005%. Water and  $\text{CO}_2$  were removed from sampled air prior to gas analysis using Drierite and soda lime, respectively. The  $\dot{V}\text{O}_2$  throughout this exercise period was determined using appropriate corrections for the system configuration (Hill, 1972). Values were adjusted for variations in chamber air leakage at different treadmill speeds. Air leakage was determined by delivering a gas mix into the chamber via a mass flow controller with an  $\text{O}_2\%$  similar to that while a *S. crassicaudata* was running. Readings were first taken while the treadmill belt was stationary and

then recorded at each belt speed used in the MMR determinations. Corrections ranged from 7% at the lowest running speed to 14% at the highest.

## Statistical analysis

Comparisons between muscles were analysed using one-way analysis of variance (ANOVAs). A Student–Newman–Keuls (SNK) multiple-range test was applied when significant differences were indicated by the ANOVA (using Statistica for Mac, StatSoft, Tulsa, OK, USA). Values are given as means  $\pm$  standard deviation (s.d.). Regression analyses were carried out using Microsoft Excel (Microsoft, Redmond, WA, USA).

## RESULTS

The mean body mass of *S. crassicaudata* in this investigation was 15.0 g (Table 1), which is similar to the mass of wild-caught animals. The contribution of skeletal muscle to body mass in *S. crassicaudata* was estimated to be  $32.3 \pm 1.96\%$  (Table 1). The size of the heart and the contributions to body mass of some other major components, such as skin and the digestive system, are also shown in Table 1.

In *S. crassicaudata*, Sv(im,mt) varied little between the muscle tissues investigated. Values were: heart,  $34.0 \pm 7.8 \text{ m}^2 \text{ cm}^{-3}$ ; diaphragm,  $36.8 \pm 5.8 \text{ m}^2 \text{ cm}^{-3}$ ; m. gluteus maximus,  $35.8 \pm 7.3 \text{ m}^2 \text{ cm}^{-3}$ ; m. deltoid,  $35.0 \pm 7.5 \text{ m}^2 \text{ cm}^{-3}$ .

The content of mitochondria in heart and a range of skeletal muscles from *S. crassicaudata* is shown in Table 2 as Vv(mt,f). The heart and diaphragm contained significantly higher densities of mitochondria than the skeletal muscles; that of the heart was  $33.9 \pm 2.7\%$ , with that of the diaphragm being  $21.1 \pm 2.9\%$  ( $F_{7,1}=47.15$ ,  $P=0.0001$ ). While values for the other muscles ranged from  $14.5 \pm 2.3\%$  for the m. multifidi lumborum of the trunk and tail to  $10.6 \pm 1.4\%$  for the m. pectoralis muscle, differences between them were not significant ( $F_{5,1}=2.116$ ,  $P=0.1$ ).

The muscle content throughout the body showed significant differences between regions (Table 3;  $F_{4,1}=51.86$ ,  $P=0.0001$ ). Both the hind leg and trunk had significantly more muscle than other regions and together comprised 60.6% of the total skeletal muscle mass. The fore leg and head/neck regions equally made up most of the residual body muscle mass, whereas the tail contained little muscle. Although Table 3 shows that there are significant differences in Vv(mt,f) in muscle regions ( $F_{4,1}=4.849$ ,  $P=0.01$ ), the

differences are relatively small and the regional mitochondrial volumes  $V(\text{mt},\text{m})$  largely reflect regional muscle masses. There is a significant difference in  $V(\text{mt},\text{m})$  across muscle regions ( $F_{4,1}=137.1$ ,  $P=0.0001$ ). The trunk has a significantly larger volume (Table 3), with the hind leg also having more than each of the remaining regions. The percentage of total muscle mitochondrial volume contained by the regions follows a similar pattern of significant differences ( $F_{4,1}=234.1$ ,  $P=0.0001$ .) The total volume of mitochondria in the skeletal muscle,  $V(\text{mt})$ , was  $0.68\pm0.064$  ml (Table 3).

Mean MMR of *S. crassicaudata* determined from sustained treadmill running was  $4.09 \text{ ml min}^{-1}$ , or  $272 \text{ mlO}_2 \text{ min}^{-1} \text{ kg}^{-1}$  ( $N=8$  animals) at an average speed of  $1.2 \text{ m s}^{-1}$  (Table 4). The basal metabolic rate (BMR) reported in a previous study (Dawson and Hulbert 1970) was  $0.320 \text{ ml min}^{-1}$  and thus the aerobic factorial scope (fAS) was 12.8.

## DISCUSSION

The muscle characteristics and aerobic capacity of the marsupial *S. crassicaudata* (Table 4) mark it as a mammal of high aerobic capacity in relation to other studies (Weibel et al., 2004; Weibel and Hoppeler, 2005). It compares favourably with *Apodemus sylvaticus*, the European wood-mouse, a similar sized placental studied in detail by Hoppeler et al. (1984). *A. sylvaticus* is grouped with the ‘athletic’ as against the ‘sedentary or normal’ mammals by those examining the structure/function relationships that underpin the aerobic capabilities of placental mammals (Weibel et al., 2004; Weibel and Hoppeler, 2005). In the phylogenetically disparate species *S. crassicaudata* and *A. sylvaticus*, both the MMR and the total muscle mitochondrial volume,  $V(\text{mt})$ , are alike (Table 4) but there are differences in the way the two species achieve their high aerobic capacities (MMRs). Notably, these are in the relative volumes of muscle and the  $V(\text{v},\text{mt},\text{f})$ .

The mean proportion of skeletal muscle in the body of placental mammals,  $M_{\text{m}}/M_{\text{b}}$  (%), is 36 – 38% (Lindstedt and Schaeffer, 2002; Weibel et al., 2004). *S. crassicaudata* with a  $M_{\text{m}}/M_{\text{b}}$  of  $32.3 \pm 1.96\%$  and *A. sylvaticus* with one of 42.5% (Table 4) fall on either side of this mean, with *A. sylvaticus* having one of the highest  $M_{\text{m}}/M_{\text{b}}$  values in the data set of Weibel et al. (2004). These authors found that  $M_{\text{m}}/M_{\text{b}}$  was independent of body mass, but was consistently higher in the ‘athletic’ group of species. The pronghorn (*Antilocapra americana*) at 45% had the highest value for a placental; but the marsupial red kangaroo (*M. rufus*) has an  $M_{\text{m}}/M_{\text{b}}$  value of 47% (Dawson et al., 2004). The relatively lower  $M_{\text{m}}/M_{\text{b}}$  of *S. crassicaudata* compared with *A. sylvaticus*, however, is offset by its relatively higher

Vv(mt,f), which is 14% versus 11% in *A. sylvaticus* (Table 4). The very similar total heart mitochondrial volumes in both species reflect this balance. This trait is a reliable predictor of the MMR of equivalent sized species among marsupials (Dawson et al., 2003) and placentals (Karas et al., 1987). The heart masses were 0.79% and 0.78% of  $M_b$  respectively for *S. crassicaudata* and *A. sylvaticus*, while Vv(mt,f) in the hearts of both species was approximately 34%.

The surface area of the inner mitochondrial membranes, S(im,m), has been consistently correlated with the activity of the terminal respiratory chain enzymes in vertebrate groups (Else and Hulbert, 1981), and appears to be functionally linked with aerobic metabolic capacity. The surface density of inner mitochondrial membranes per unit volume of mitochondria, Sv(im,mt), in the muscles of *S. crassicaudata* is  $\sim 35 \text{ m}^2 \text{ cm}^{-3}$ , which is similar to that of other marsupials (Dawson et al., 2004; Webster and Dawson, 2012) and placentals including *A. sylvaticus* (Hoppeler et al., 1981; Hoppeler et al., 1984; Schwerzmann et al., 1989). Since S(im,m) equals V(mt,m) multiplied by Sv(im,mt) (equation 2), mitochondrial volume in skeletal muscle can be used as a proxy for S(im,m). The high overall Vv(mt,f) of *S. crassicaudata* relative to that of *A. sylvaticus* and those of other placentals compiled by Weibel et al. (2004) results from high mitochondrial volume densities in all muscles across the body (Tables 2 and 3). The Vv(mt,f) of individual muscles, except for the diaphragm, did not vary through the body (Table 2); this would reflect *S. crassicaudata*'s active quadrupedal lifestyle. The pattern differs in the more specialised kangaroos, whereby muscle Vv(mt,f) is markedly higher in the region of the pelvis and lower back where the bulk of the skeletal muscle is also found (Dawson et al., 2004).

These data from *S. crassicaudata* considerably extend our understanding of the overall aerobic capacities of marsupials relative to those of placentals. Initially an investigation of the cardio-respiratory allometry in marsupials (Dawson and Needham, 1981) identified them as having the capability for a considerable aerobic capacity. Dawson and Dawson (1982) further challenged the notion that marsupials, with their low BMRs, were 'low energy' mammals. Two small marsupials species that they exposed to cold had generally larger fAS, 8 – 9 as against 4 – 6 for similar-sized placental species, and aerobic capabilities equivalent to those of the placentals. Data from Hinds et al. (1993) further highlighted relatively high fAS values in a range of marsupials. In response to cold, marsupials and placentals were able to increase aerobic metabolism above BMR by 8.3 and 5.1 times, respectively; values during locomotion were almost twice those observed in

the cold (Hinds et al. 1993) and fAS values were again higher in marsupials (17) than in placentals (13.5). However, subsequent locomotor investigations indicate that Hinds et al. (1993) underestimated fAS of marsupials.

The aerobic factorial scope of *M. rufus* is of the order of 54 (Dawson et al., 2004). How could this be so much greater than the value of 17 given by Hinds et al. (1993) for the fAS of marsupials during locomotion? The answer comes from the investigations on placentals by Weibel, Hoppeler and Taylor and co-workers (for references and reviews see Weibel et al., 2004 and Weibel and Hoppeler, 2005). Allometric equations from their studies show that MMR is more loosely associated with BMR than was previously considered. When MMR is plotted against  $M_b$  for placentals, two distinct patterns occur (Weibel et al., 2004). One group of species has a relatively high MMR while most other species tend to have a distinctly lower MMR, the former was designated ‘athletic’ and the latter ‘sedentary’ (Fig. 1). Furthermore, these MMR patterns vary with  $M_b$  in a different manner than does BMR. While the allometric equations usually used for BMR have an exponent of 0.75, the exponents found for MMR of ‘athletic’ and ‘sedentary’ placentals were much steeper, 0.942 and 0.849 respectively (Fig. 1). Weibel and co-workers have shown that MMR is largely set by the energy needs of active cells, primarily those in muscle, during maximal work and that total skeletal muscle mitochondrial volume,  $V(mt)$ , is a superior proxy for this (Weibel et al., 2004). ‘Athletic’ species had greater  $V(mt)$  than ‘sedentary’ species, which was due to either greater  $M_m/M_b$  and/or higher  $V_v(mt,f)$ . Overall, as initially proposed (Hoppeler and Lindstedt, 1985), there was a strong and consistent correlation between MMR and  $V(mt)$  (Fig. 2). Our previous studies (Dawson et al., 2004; Webster and Dawson, 2012) have shown that both the hopping marsupials have MMRs that fall within the ‘athletic’ grouping in relation to  $M_b$  (Fig. 1), and that the relationship between MMR and  $V(mt)$  is indistinguishable to that of placentals (Fig. 2). Given the large evolutionary distance and the disparity in body form between modern placentals and the kangaroos and rat-kangaroos, we were somewhat surprised to find comparable relationships. The volume of muscle, its total mitochondrial content and its overall vascular supply were essentially identical in the Macropodiformes to values seen in ‘athletic’ placental mammals.

Thus, our data for *S. crassicaudata* provide a wide size range over which marsupials have aerobic capabilities that are essentially similar to those of ‘athletic’ placentals (Fig. 1), despite the significantly lower BMR of these marsupials (Table 4). Notably, while  $V(mt)$  is high in *S. crassicaudata*, the relationship between MMR and

V(mt) follows the general mammalian pattern (Fig. 2). Does a pattern of ‘athleticism’ pertain for most other marsupials or do marsupials also have variable aerobic potentials, as do placentals (Weibel et al., 2004; Weibel and Hoppeler, 2005)? Available information is equivocal in regard to this question. The only marsupial for which comparable information is also available on MMR and on muscle and muscle mitochondria volumes (Table 4) is the Gray short-tailed opossum (*Monodelphis domestica*, Family: Didelphidae) that was investigated by Schaeffer et al. (2003). The MMR of *M. domestica* is relatively low (Table 4; Fig. 1) and falls in line with the ‘sedentary’ placentals, not with ‘athletic’ small mammals such as the placental *A. sylvaticus* and the marsupials, *S. crassicaudata* and *B. penicillata*. This is somewhat surprising given its fAS at 13.6 is relatively large, but this mostly reflects it having a BMR that is low, even for a marsupial (Table 4). The BMR of *M. domestica* is approximately 70% of the value predicted for a marsupial of its mass (including other didelphids) from the allometric equations of Dawson and Hulbert (1970) and Withers et al. (2006). However, the relationship between MMR and V(mt) in *M. domestica* is similar to that of mammals generally (Fig. 2) and its Vv(mt,f) is also relatively low (Table 4).

Apart from the results for *M. domestica*, other data suggest that high aerobic capacity may be a general characteristic of marsupials. For example, marsupials tend to have larger hearts than placentals (Dawson et al., 2003), a trait that benefits attaining high MMR. Also, the data collected by Hinds et al. (1993) corroborates the greater aerobic potential of marsupials when it is examined in detail. The MMR of marsupials during locomotion that they report are from untrained animals, but still, with their expanded fASs, they mostly exceed those of trained ‘sedentary’ placentals (Fig. 1). Full treadmill training presumably would increase the MMR of many of these species to ‘athletic’ levels, as we found for *S. crassicaudata* (Fig. 1). A clear supporting framework for these abilities is apparent in other species so far examined. As in ‘athletic’ placentals (Weibel et al., 2004; Weibel and Hoppeler, 2005), the peak aerobic demands associated with maximum energy output by muscle are met via the commensurate, matched oxygen supply system from the lungs to the muscle mitochondria via the expanded supply of erythrocytes. This is the concept of symmorphosis (Weibel 2000) and it also pertains to *M. rufus* and *B. penicillata* (Dawson et al., 2004; Webster and Dawson, 2012). Following this concept, there are numerous other studies that lend support for a generally high MMR in marsupials. These examined lung structure and function of the respiratory system (Dawson and Needham, 1981; Hallam et al., 1989; Chappell and Dawson, 1994; Dawson et al., 2000b), heart

structure and capacities (Dawson and Needham, 1981; Dawson et al., 2003), blood oxygen affinities (Hallam et al., 1995) and relative hematocrit levels (Agar et al., 2000).

Broadly then, clades of mammals, both placental and marsupial, have evolved elevated aerobic capacities that can be sustained by small species for at least several minutes and for relatively longer periods in larger species. The evolutionary forces behind such elevated capabilities are likely diverse, but the predator – prey ‘arms race’ (Vermeij, 1987) initially comes to mind. The MMR that a mammal can attain is clearly determined by the functional characteristics of muscle mitochondria, for which  $V(mt)$  is an appropriate proxy (Fig 2).  $V(mt)$  results from various mixes of  $M_m/M_b$  ratios and  $V(mt,m)$  levels of individual muscles, which can also vary markedly. In regard to the link between MMR and BMR, it seems to be much more loose than previously accepted. The patterns differ considerably between marsupials and placentals, as indicated by their differing fAS values. Although fAS shows much plasticity, consider the value of 54 for *M. rufus*, there is an apparent upper limit to MMR based at the ‘athletic’ level shown by Weibel et al. (2004) and Weibel and Hoppeler (2005), which we have shown is also reached by marsupials. Some mammalian groups may have evolutionarily varied their energetic profile by varying their basic energetic structure, i.e. their BMR. For example, a relatively low BMR in *M. domestica* is reflected in a low MMR (Table 4), which is seen in the converse in red-toothed shrews of the subfamily Soricinae such as *Blarina brevicauda* and *Sorex araneus* (Dawson and Olson, 1987; Poppitt et al., 1993). However, underlying patterns are common to marsupials and placentals and indicate that the basic structure/function framework for mammalian aerobic capabilities is ancient. It must at least predate the divergence of the therians.

The high MMR of *S. crassicaudata* does not completely explain the unusual patterns in the allometry of FMR in marsupials and placentals, whereby small marsupials have higher FMRs than placentals (Koteja, 1991; Nagy et al., 1999; Cooper et al., 2003; Capellini et al., 2010). The BMR of *S. crassicaudata* is 75% of that predicted for a similar sized placental, yet its FMR at ~ 7 times BMR (Nagy, 1988) is almost double the predicted FMR for a placental (Fig. 3). In the context of its high MMR, via a fAS of 13, *S. crassicaudata* has ample aerobic capacity for such an FMR (Fig. 3). The reasons behind the high FMRs of small marsupials are conjectural, but the fact that most small marsupials are insectivore/carnivores could be an underlying feature. Note, that while *A. sylvaticus* has a high MMR, this omnivorous rodent only has a FMR at ~ 3.2 times BMR (Speakman,

1997). Nagy and coauthors (Nagy et al., 1999 and Nagy, 2005) highlight the plasticity of FMR in mammals and point to numerous causes.

That FMR and MMR, with its clear connection to  $V(mt)$ , may not be closely linked via BMR in mammals is highlighted by energetic profiles displayed among marsupials. As with placentals, these show marked impacts associated with  $M_b$  (Fig. 3) and it is instructive to compare the overall data for *S. crassicaudata* with that for the large kangaroo, *M. rufus* (Fig. 3). While the BMR of *M. rufus* is ~ 75% of that of a placental, its FMR is low, 50% of that predicted for a placental (Munn et al. 2008). That *M. rufus*, with a fAS of 54, has one of the highest mammalian MMRs highlights the looseness in connections between the energy ‘levels’ of mammals. The patterns in the levels of energy use among mammals that we have clarified also robustly contest the proposal that design features of the  $O_2$  transport system lock in an allometric exponent of 0.75 for the relationship between  $M_b$  and BMR (West et al., 1997; West et al., 1999) that extends mechanistically to MMR and FMR, as in the ‘metabolic theory of ecology’ (MTE) (Brown et al., 2004).

443

444

445 **LIST OF SYMBOLS AND ABBREVIATIONS**

|                   |                                                                                  |
|-------------------|----------------------------------------------------------------------------------|
| d                 | density of muscle                                                                |
| fAS               | factorial aerobic scope                                                          |
| $M_b$             | body mass                                                                        |
| $M_m$             | muscle mass                                                                      |
| $S_v(im,mt)$      | surface density of inner mitochondrial membranes per unit volume of mitochondria |
| $S(im,m)$         | total surface area of inner mitochondrial membranes                              |
| $V(mt)$           | total mitochondrial volume of skeletal muscle                                    |
| $V(mt,m)$         | mitochondrial volume of individual muscles (or muscle regions)                   |
| $\dot{V}O_{2max}$ | maximal aerobic oxygen consumption                                               |
| $V_v(f,m)$        | volume fraction of muscle occupied by muscle fibres                              |
| $V_v(mt,f)$       | volume fraction of mitochondria                                                  |

446

447 **ACKNOWLEDGEMENTS**

448 Staff of the University of New South Wales Electron Microscope Unit provided much  
 449 instruction on processing samples for electron microscopy and the use of two models of  
 450 transmission electron microscopes. Mrs Sigrid Fraser of the UNSW Electron Microscope  
 451 Unit performed sample processing not performed by the authors.

452

453 **FUNDING**

454 This work was supported by the Australian Research Council [GRANT A199172218 to  
 455 TJD and DP0453021 to WAB]. The study was carried out under approval given by the  
 456 University of New South Wales and University of Wollongong Animal Care and Ethics  
 457 Committees (project approval number 00-17 and 04/06, respectively).

458

## REFERENCES

- Agar, N. S., Reinke, N. B., Godwin, I. R. and Kuchel, P. W.** (2000). Comparative Biochemistry of Marsupial Erythrocytes: A Review. *Comp. Haematol. Int.* **10**, 148–167.
- Barth, E., Stämmler, G., Speiser, B. and Schaper, J.** (1992). Ultrastructural quantitation of mitochondria and myofilaments in cardiac muscle from 10 different animal species including man. *J. Mol. Cell. Cardiol.* **24**, 669-681.
- Bartholomew, G. A. D., Vleck, D. and Vleck, C. M.** (1981). Instantaneous measurements of oxygen consumption during pre-flight warm-up and post-flight cooling in sphingid and saturniid moths. *J. exp. Biol.* **90**, 17-32.
- Bininda-Emonds, O. R. P., Cardillo, M., Jones, K. E., MacPhee, R. D. E., Beck, R. M. D., Grenyer, R., Price, S. A., Vos, R. A., Gittleman, J. L. and Purvis, A.** (2007). The delayed rise of present-day mammals. *Nature* **446**, 507–512.
- Brown, J. H., Gillooly, J. F., Allen, A. P. Savage, A. M. and West, G. B.** (2004). Toward a metabolic theory of ecology. *Ecology* **85**, 1771-1789.
- Capellini, I., Vendith, C. and Barton, R. A.** (2010). Phylogeny and metabolic scaling in mammals. *Ecology* **91**, 2783-2793.
- Chappell, M. A. and Dawson, T. J.** (1994). Ventilatory accommodation of changing oxygen consumption in dasyurid marsupials. *Physiol. Zool.* **67**, 418-437.
- Cooper, C. E., Withers, P. C. and Bradshaw, S. D.** (2003). Field metabolic rate and water turnover of the numbat (*Myrmecobius fasciatus*). *J. Comp. Physiol. B.* **173**, 687–693.
- Dawson, T. J.** (1973). “Primitive mammals”. In *Comparative Physiology of Thermoregulation, Vol. 3, Special Aspects of Thermoregulation* (ed. G.C. Whittow), pp. 1-46. New York & London: Academic Press.
- Dawson, T. J.** (1989). Responses to cold of monotremes and marsupials. In *Advances in Comparative and Environmental Physiology Vol 4, Animal Adaptation to Cold* (ed. L.C. H Wang), pp. 255-288. Berlin: Springer-Verlag.
- Dawson, T. J., Blaney, C. E., Munn, A. J., Krockenberger, A. and Maloney, S. K.** (2000a). Thermoregulation by kangaroos from mesic and arid habitats: influence of temperature on routes of heat loss in eastern grey kangaroos (*Macropus giganteus*) and red kangaroos (*Macropus rufus*). *Physiol. Biochem. Zool.* **73**, 374–381.

- 491 **Dawson, T. J. and Dawson, W. R.** (1982). Metabolic scope and conductance in response  
 492 to cold of some dasyurid marsupials and Australian rodents. *Comp. Biochem. Physiol.*  
 493 *A* **71**, 59–64.
- 494 **Dawson, T. J. and Hulbert, A. J.** (1970). Standard metabolism, body temperature, and  
 495 surface areas of Australian marsupials. *Am. J. Physiol.* **218**, 1233-1238.
- 496 **Dawson, T. J. and Needham, A. D.** (1981). Cardiovascular characteristics of two resting  
 497 marsupials: an insight into the cardio-respiratory allometry of marsupials. *J. Comp.*  
 498 *Physiol. B.* **145**, 95–100.
- 499 **Dawson, T. J., Mifsud, B., Raad, M. C. and Webster, K. N.** (2004). Aerobic  
 500 characteristics of red kangaroo skeletal muscles: is a high aerobic capacity matched by  
 501 mitochondrial and capillary morphology as in placental mammals? *J. Exp. Biol.* **207**,  
 502 2811-2821.
- 503 **Dawson, T. J., Munn, A. J., Blaney, C. E., Krockenberger A. and Maloney, S.K.** (2000b)  
 504 Ventilatory accommodation of oxygen demand and respiratory water loss in kangaroos from  
 505 mesic and arid environments, the eastern Grey Kangaroo (*Macropus giganteus*) and the red  
 506 kangaroo (*M. rufus*), and a re-examination of ventilatory allometry for marsupials. *Physiol.*  
 507 *Biochem. Zool.* **73**, 382–388.
- 508 **Dawson, T. J. and Olson, J. M.** (1987). The summit metabolism of the short-tailed shrew  
 509 *Blarina brevicauda*: A high summit is further elevated by cold acclimation. *Physiol.*  
 510 *Zool.* **60**, 631-637.
- 511 **Dawson, T. J. and Olson, J. M.** (1988). Thermogenic capabilities of the opossum  
 512 *Monodelphis domestica* when warm and cold acclimated: Similarities between  
 513 American and Australian marsupials. *Comp. Biochem Physiol.* **89A**, 85-91.
- 514 **Dawson, T. J., Webster, K. N., Mifsud, B., Raad, E., Lee, E. and Needham, A. D.**  
 515 (2003). Functional capacities of marsupial hearts: size and mitochondrial parameters  
 516 indicate higher aerobic capabilities than generally seen in placental mammals. *J.*  
 517 *Comp. Physiol. B.* **173**, 583-590.
- 518 **Else, P. L. and Hulbert, A. J.** (1981). Comparison of the "mammal machine" and the  
 519 "reptile machine": energy production. *Am. J. Physiol.* **240**, R3-R9.
- 520 **Haim, A., McDevitt, R. M. and Speakman, J. R.** (1995). Thermoregulatory responses to  
 521 manipulations of photoperiod in wood mice *Apodemus sylvaticus* from high latitudes  
 522 (57°N). *J. Therm. Biol.* **20**, 437-443.
- 523 **Hallam, J. F., Dawson, T. J. and Holland, R. A. B.** (1989). Gas exchange in the lung of

- 524 a dasyurid marsupial: morphometric estimation of diffusion capacity and blood uptake  
 525 kinetics. *Resp. Physiol.* **77**, 309-322.
- 526 **Hallam, J. F., Holland, R. A. B. and Dawson, T. J.** (1995). The blood of carnivorous  
 527 marsupials: Low hemoglobin oxygen affinity. *Physiol. Zool.* **68**, 342-354.
- 528 **Hayssen, V. and Lacy, R. C.** (1985). Basal metabolic rates in mammals: Taxonomic  
 529 differences in the allometry of BMR and body mass. *Comp. Biochem. Physiol.* **81A**,  
 530 741-754.
- 531 **Hinds, D. S., Baudinette, R. V., MacMillen, R. E. and Halpern, E. A.** (1993).  
 532 Maximum metabolism and the aerobic factorial scope of endotherms. *J. Exp. Biol.*  
 533 **182**, 41-56.
- 534 **Hill, R. W.** (1972). Determination of oxygen consumption by use of the paramagnetic  
 535 oxygen analyser. *J. Appl. Physiol.* **33**, 261-263.
- 536 **Hoppeler, H., Kayar, S. R., Classen, H., Uhlmann, E. and Karas, R. H.** (1987).  
 537 Adaptive variation in the mammalian respiratory system in relation to energetic  
 538 demand: III. Skeletal muscles: setting the demand for oxygen. *Respir. Physiol.* **69**, 27-  
 539 46.
- 540 **Hoppeler, H. and Lindstedt, S.L.** (1985) Malleability of skeletal muscle in overcoming  
 541 limitations: structural elements. *J. exp. Biol.* **115**, 355-364.
- 542 **Hoppeler, H., Lindstedt, S. L., Uhlmann, E., Niesel, A., Cruz-Orive, L. M. and**  
 543 **Weibel, E. R.** (1984). Oxygen consumption and the composition of skeletal muscle  
 544 tissue after training and inactivation in the European woodmouse (*Apodemus*  
 545 *sylvaticus*). *J. Comp. Physiol. B* **155**, 51-61.
- 546 **Hoppeler, H., Mathieu, O., Krauer, R., Classen, H., Armstrong, R. B. and Weibel, E.**  
 547 **R.** (1981). Design of the mammalian respiratory system. VI. Distribution of  
 548 mitochondria and capillaries in various muscles. *Respir. Physiol.* **44**, 87-111.
- 549 **Howard, C. V. and Reed, M. G.** (1998). *Unbiased Stereology: Three-Dimensional*  
 550 *Measurement in Microscopy*. Oxford: BIOS Scientific Publishers Ltd.
- 551 **Karas, R. H., Taylor, C. R., Rosler, K. and Hoppeler, H.** (1987). Adaptive variation in  
 552 the mammalian respiratory system in relation to energetic demand: V. Limits to  
 553 oxygen transport by the circulation. *Respir. Physiol.* **69**, 65-79.
- 554 **Koteja, P.** (1991), On the relation between basal and field metabolic rates in birds and  
 555 mammals. *Funct. Ecol.* **5**, 56-64.

- 556 **Krajewski, C., Anderson, F. E., Woolley, P. A. and Westerman, M.** (2012). Molecular  
 557 evidence for a deep clade of dunnarts (Marsupialia: Dasyuridae: Sminthopsis). *J*  
 558 *Mammal. Evol.*, DOI: 10.1007/s10914-012-9204-3
- 559 **Kram, R. and Dawson, T. J.** (1998). Energetics and biomechanics of locomotion by red  
 560 kangaroos (*Macropus rufus*). *Comp. Biochem. Physiol. B* **120**, 41-49.
- 561 **Lindstedt, S. and Schaeffer P. J.** (2002). Use of allometry in predicting anatomical and  
 562 physiological parameters of mammals. *Lab. Anim.* **36**, 1-19.
- 563 **Martin, C. J.** (1902). Thermal adjustment and respiratory exchange in monotremes and  
 564 marsupials. *Phil. Trans. R. Soc. Lond.* **195**, 1-37.
- 565 **McNab, B. K.** (1980). Food habits, energetics, and the population biology of mammals.  
 566 *Amer. Nat.* **116**, 106-124.
- 567 **McNab, B. K.** (2005). Uniformity in the basal metabolic rate of marsupials: its causes and  
 568 consequences. *Revista Chilena de Historia Natural.* **78**, 183-198.
- 569 **Morton, S. R.** (1978). An ecological study of *Sminthopsis crassicaudata* (Marsupialia:  
 570 Dasyuridae), Parts 1, 2 and 3. *Aust. Wildl. Res.* **5**: 151-211.
- 571 **Mendez, J. and Keys, A.** (1960). Density and composition of mammalian muscle.  
 572 *Metabolism* **9**, 184-188.
- 573 **Meredith, R. W., Westerman, M. and Springer, M. S.** (2008). A phylogeny and time  
 574 scale for living kangaroos and kin (Macropodiformes: Marsupialia) based on nuclear  
 575 DNA sequences. *Aust. J. Zool.* **56**, 395-410.
- 576 **Munn, A., Dawson, T. J., McLeod, S. R., Croft, D. B., Thompson M. B. and Dickson**  
 577 **C. R.** (2008). Field metabolic rate and water turnover of red kangaroos and sheep in  
 578 an arid rangeland: an empirically derived dry-sheep-equivalent for kangaroos. *Aust. J.*  
 579 *Zool.* **57**, 23-28.
- 580 **Nagy, K. A.** (1988). Field metabolic rate and food requirement of a small dasyurid  
 581 marsupial, *Sminthopsis crassicaudata*. *Aust. J. Zool.* **36**, 293-299.
- 582 **Nagy, K. A.** (2005). Field metabolic rate and body size. *J. Exp. Biol.* **208**, 1621-1625.
- 583 **Nagy, K. A., Girard, I. A. and Brown, T. K.** (1999). Energetics of free ranging  
 584 mammals, reptiles, and birds. *Ann. Rev. Nutr.* **19**, 247-277.
- 585 **Poppitt, S. D., Speakman, J. R. and Racey, P. A.** (1993). The energetics of reproduction  
 586 in the common shrew (*Sorex araneus*): A comparison of indirect calorimetry and the  
 587 doubly labelled water method. *Physiol. Zool.* **66**, 964-982.

- 588 **Schaeffer, P. J., Villarin, J. J. and Lindstedt, S. L.** (2003). Chronic cold exposure  
589 increases skeletal muscle oxidative structure and function in *Monodelphis domestica*,  
590 a marsupial lacking brown adipose tissue. *Physiol. Biochem. Zool.* **76**, 877-887.
- 591 **Schwerzmann, K., Hoppeler, H., Kayar, S. R. and Weibel, E. R.** (1989). Oxidative  
592 capacity of muscle and mitochondria: Correlation of physiological, biochemical, and  
593 morphometric characteristics. *Proc. Natl. Acad. Sci. USA* **86**, 1583-1587.
- 594 **Seeherman, H. J., Taylor, C. R., Maloiy, G. M. O. and Armstrong, R. B.** (1981).  
595 Design of the mammalian respiratory system. I. Measuring maximum aerobic  
596 capacity. *Respir. Physiol.* **44**, 11-23.
- 597 **Speakman, J.** (1997). Factors influencing the daily energy expenditure of small mammals.  
598 *Proc. Nutrit. Soc.* **56**, 1119-1136.
- 599 **Taylor, C. R., Karas, R. H., Weibel, E. R. and Hoppeler, H.** (1987). Adaptive variation  
600 in the mammalian respiratory system in relation to energetic demand: II. Reaching  
601 the limits to oxygen flow. *Respir. Physiol.* **69**, 7-26.
- 602 **Taylor, C. R., Maloiy, G. M. O., Weibel, E. R., Langman, V. A., Kamau, J. M. Z.,**  
603 **Seeherman, H. J. and Heglund, N. C.** (1981). Design of the mammalian respiratory  
604 system. III. Scaling maximum aerobic capacity to body mass: wild and domestic  
605 mammals. *Respir. Physiol.* **44**, 25-37.
- 606 **Vermeij, G. J.,** (1987). *Evolution and escalation: An ecological history of life*. Princeton,  
607 NJ: Princeton University Press.
- 608 **Webster, K. N. and Dawson, T. J.** (2003). Locomotion energetics and gait characteristics  
609 of a rat-kangaroo, *Bettongia penicillata*, have some kangaroo-like features. *J. Comp.*  
610 *Physiol. B* **173**, 549-557.
- 611 **Webster, K. N. and Dawson, T. J.** (2012). The high aerobic capacity of a small,  
612 marsupial rat-kangaroo (*Bettongia penicillata*) is matched by the mitochondrial and  
613 capillary morphology of its skeletal muscles. *J. Exp. Biol.* **215**, 3223-3230.
- 614 **Weibel, E. R.** (1980). *Stereological methods*. London: Academic Press.
- 615 **Weibel, E. R.** (2000). *Symmorphosis: On Form and Function in Shaping Life*. Cambridge  
616 MA: Harvard University Press.
- 617 **Weibel, E. R., Bacigalupe, L. D., Schmitt, B. and Hoppeler, H.** (2004). Allometric  
618 scaling of maximal metabolic rate in mammals: muscle aerobic capacity as  
619 determinant factor. *Respir. Physiol. & Neurobiol.* **140**, 115-132.

- 620 **Weibel, E. R. and Hoppeler, H.** (2005). Exercise-induced maximal metabolic rate scales  
621 with muscle aerobic capacity. *J. Exp. Biol.* **208**, 1635-1644.
- 622 **West, G. B., Brown, J. H. and Enquist, B. J.** (1997). A general model for the origin of  
623 allometric scaling laws in biology. *Science* **276**, 122-126.
- 624 **West, G. B., Brown, J. H. and Enquist, B. J.** (1999). The fourth dimension of life: fractal  
625 geometry and allometric scaling of organisms. *Science* **284**, 1677-1679.
- 626 **Withers, P. C., Cooper, C. E. and Larcombe, A. N.** (2006). Environmental correlates of  
627 physiological variables in marsupials. *Physiol. Biochem. Zool.* **79**, 437-453.
- 628

629

**Table 1. Body mass, with contributions of muscle and other body components to the body mass of the Fat-tailed Dunnart (*Sminthopsis crassicaudata*).**

|                                           |              |
|-------------------------------------------|--------------|
| Body Mass (g)                             | 15.0 ± 1.28  |
| Total Skeletal Muscle (g)                 | 4.83 ± 0.223 |
| Total Skeletal Muscle (% M <sub>b</sub> ) | 32.3 ± 1.96  |
| Gut + liver (% M <sub>b</sub> )           | 14.2 ± 1.23  |
| Heart (% M <sub>b</sub> )                 | 0.79 ± 0.068 |
| Skin (% M <sub>b</sub> )                  | 17.5 ± 0.986 |

630

Values are means ± s.d., N=5.

631

632

**Table 2. Mitochondrial volume density of muscles from regions of the body of the Fat-tailed Dunnart (*Sminthopsis crassicaudata*).**

| Muscles sampled    | Body section | Vv(mt,f) %   |
|--------------------|--------------|--------------|
| Heart              |              | 33.9 ± 2.7 a |
| Trapezius          | Head/Neck    | 12.9 ± 1.2 c |
| Deltoid            | Fore leg     | 12.1 ± 1.2 c |
| Diaphragm          | Trunk        | 21.1 ± 2.9 b |
| Pectoralis         | Trunk        | 10.6 ± 1.4 c |
| Multifidi lumborum | Trunk, tail  | 14.5 ± 2.3 c |
| Gluteus maximus    | Hind leg     | 13.0 ± 1.5 c |
| Quadriceps         | Hind leg     | 12.9 ± 4.0 c |

633

634 Vv(mt,f) is mitochondrial volume density. Values are means ± s.d., N=5. In columns, values that are  
 635 significantly different have different letters associated (SNK test, P< 0.05).

636

**Table 3. Distribution of muscle and muscle mitochondria in the body of the Fat-tailed Dunnart**  
**(*Sminthopsis crassicaudata*).**

| Body region                                           | muscle mass  | Vv(mt,f)                  | V(mt,m)         | V(mt,m)       |
|-------------------------------------------------------|--------------|---------------------------|-----------------|---------------|
|                                                       | % of total   | (%)                       | (ml)            | % of total    |
| Head & neck                                           | 17.8 ± 2.2 b | 12.9 ± 1.2 b              | 0.111 ± 0.010 c | 16.4 ± 1.42 c |
| Fore leg                                              | 19.8 ± 1.7 b | 12.1 ± 1.2 b              | 0.117 ± 0.11 c  | 17.3 ± 2.17 c |
| Trunk                                                 | 28.8 ± 4.8 a | 15.4 ± 1.7 a              | 0.237 ± 0.027 a | 35.0 ± 0.85 a |
| Hind leg                                              | 31.8 ± 4.7 a | 13.0 ± 2.1 b              | 0.199 ± 0.032 b | 29.4 ± 2.16 b |
| Tail                                                  | 1.7 ± 0.3 c  | 14.5 ± 2.3 a,b            | 0.012 ± 0.002 d | 1.7 ± 0.17 d  |
| Total muscle mass (M <sub>m</sub> ) = 4.83 ± 0.22 (g) |              | V(mt) = 0.68 ± 0.064 (ml) |                 |               |

Values are means ± s.d., N=5. In columns, significantly different values have different letters associated, P< 0.05. Vv(mt,f) values were derived from the mean densities of mitochondria in the muscles sampled from these regions (Table 2). V(mt,m) values are the mitochondrial volume in muscle regions, either as total volume of mitochondrial or as a % of total muscle mitochondria; V(mt) is the total muscle mitochondrial volume of the whole body.

637  
638  
639  
640  
641  
642

**Table 4. Relationship between mitochondrial content of the skeletal muscle and aerobic capacity in a marsupial, the Fat-tailed Dunnart (*Sminthopsis crassicaudata*), as compared with the ‘athletic’ placental Wood-mouse (*Apodemus sylvaticus*) and two small marsupials, the Rat-kangaroo (*Bettongia penicillata*) and the short-tailed opossum (*Monodelphis domestica*).**

| Parameter                      | Unit                                                   | Dunnart <sup>a</sup> | Wood-mouse <sup>b</sup> | Rat-kangaroo <sup>c</sup> | Opossum <sup>d</sup> |
|--------------------------------|--------------------------------------------------------|----------------------|-------------------------|---------------------------|----------------------|
| <b>Mitochondria content</b>    |                                                        |                      |                         |                           |                      |
| M <sub>b</sub>                 | g                                                      | 15.0±1.28            | 20.3                    | 1000                      | 89.4                 |
| M <sub>m</sub> /M <sub>b</sub> | %                                                      | 32.3±1.97            | 42.5                    | 43.5                      | 32                   |
| V <sub>v</sub> (mt,f)          | %                                                      | 14.0±1.33            | 11.0                    | 8.7                       | 8.4                  |
| V(mt)/M <sub>b</sub>           | ml kg <sup>-1</sup>                                    | 45.0±4.26            | 43.5                    | 36.0                      | 30.1                 |
| <b>Aerobic Capacity</b>        |                                                        |                      |                         |                           |                      |
| $\dot{V}O_{2\max}/M_b$         | mlO <sub>2</sub> min <sup>-1</sup> kg <sup>-1</sup>    | 272±30.9             | 264                     | 177                       | 129                  |
| BMR                            | mlO <sub>2</sub> min <sup>-1</sup> kg <sup>-1</sup>    | 21.3±1.77            | 28.0                    | 7.8                       | 9.53                 |
| BMR                            | mlO <sub>2</sub> min <sup>-1</sup> kg <sup>-0.72</sup> | 6.6                  | 9.4                     | 7.8                       | 4.9                  |
| fAS                            |                                                        | 12.8±1.45            | 9.4                     | 23                        | 13.6                 |
| $\dot{V}O_{2\max} / V_v(mt)$   | mlO <sub>2</sub> min <sup>-1</sup> ml <sup>-1</sup>    | 6.1±0.56             | 5.0                     | 4.9                       | 4.3                  |

644  $V(\text{mt,m})/M_b$  is the mass-specific mitochondrial volume. For *S. crassicaudata* Values are means  $\pm$  s.d. Data sources other than current study: a) *S. crassicaudata*;  
645 BMR from Dawson and Hulbert (1970). b) *A. sylvaticus*; BMR from Haim et al. (1995), other data from Hoppeler et al. (1984); c) *B. penicillata* from Webster and  
646 Dawson (2003; 2012). d) *M. domestica*; BMR from Dawson and Olson, (1988), other data from Schaeffer et al., (2003).

647

648

649

**Table 5. Allometric equations relating BMR, FMR and MMR to  $M_b$  in mammals, corresponding to the lines in Figure 3.****In each case, equations are of the form  $MR = a.M_b^b$ , with MR in  $ml\ O_2\ min^{-1}$  and  $M_b$  in kg.**

| Metabolic rate   | Mammalian group                            | a      | b    | Line # in Figure 3 | Source                                                                     |
|------------------|--------------------------------------------|--------|------|--------------------|----------------------------------------------------------------------------|
| BMR              | Marsupials                                 | 6.68   | 0.72 | 1                  | Capellini et al. (2010) <sup>1</sup>                                       |
|                  | Placentals (all)                           | 7.57   | 0.72 | n/a                | Capellini et al. (2010) <sup>1</sup>                                       |
|                  | Placentals (four Orders only) <sup>2</sup> | 9.04   | 0.72 | 2                  | Data from Capellini et al. (2010) and Heyssen and Lacy (1985) <sup>2</sup> |
| FMR <sup>3</sup> | Marsupials                                 | 19.21  | 0.60 | 4                  | Capellini et al. (2010) <sup>1</sup>                                       |
|                  | Placentals                                 | 26.76  | 0.74 | 3                  | Capellini et al. (2010) <sup>1</sup>                                       |
| MMR              | All 'athletic' mammals                     | 199.64 | 0.93 | 5                  | Fig. 1 of the present study                                                |

650 Notes:

651 1. Values for the intercept "a" were provided via personal communication with I. Capellini.

652 2. For comparison with the four placental Orders for which MMR data are available (Weibel et al., 2004), we calculated an equation relating BMR to  $M_b$  for just these  
653 four Orders, using data for Orders Artiodactyla, Carnivora and Rodentia from Capellini et al. (2010) and data for the horse, *Equus caballus* (Order Perissodactyla)  
654 from Hayssen and Lacy (1985).

655 3. Conversion of FMR from units of  $kJ\ day^{-1}$  (Capellini et al., 2010) to units of  $ml\ O_2\ min^{-1}$  assumed that 1000 ml of  $O_2$  provides 20.1 kJ of energy.

## Figure Legends

Fig. 1. Maximum metabolic rate, MMR, as a function of body mass,  $M_b$ , in mammals. 'Athletic' mammals (filled circles and solid line) have a different relationship between MMR and  $M_b$  than do more 'sedentary' mammals (open circles and dashed line). Marsupial species values may fall either on the 'athletic' line (*S. crassicaudata*, *B. penicillata*, *M. rufus*) or on the 'sedentary' line (*M. domestica*). Marsupial data are from the present study, Seeherman et al. (1981), Kram and Dawson (1998) and Schaeffer et al. (2003), respectively. Placental data are from Weibel et al. (2004). Allometric equations shown on the graph include all species (placentals and marsupials) but slopes and elevations are not significantly different from the placental-only equations in Weibel et al. (2004).

Also shown are data for several marsupial species (including *S. crassicaudata*) from Hinds et al. (1993); the allometric equation for this data-set is  $MMR = 131.76 M_b^{0.882}$ , with  $r^2 = 0.9949$  (triangles and dotted line). This line falls between the 'sedentary' and 'athletic' lines, and may indicate incomplete treadmill training of the individuals used in the study; see text for details.

Fig. 2. Maximum metabolic rate, MMR, as a function of total mitochondrial volume,  $V(mt)$ , in mammals. Marsupial species (open circles) data are: *S. crassicaudata*, from the present study; *M. domestica*, from Schaeffer et al. (2003), *B. penicillata*, from Webster and Dawson (2012), and *M. rufus*, from Dawson et al. (2004). Numbers at right identify the placental mammal species (filled circles): 1, woodmouse; 2, mole rat; 3, white rat; 4, guinea pig; 5, agouti; 6, fox; 7, goat; 8, dog; 9, pronghorn; 10, horse; 11, steer; data are from Weibel et al. (2004).

Fig. 3. Different levels of metabolic rate (BMR, FMR and MMR) as a function of  $M_b$  in mammals; line 1, marsupial BMR; line 2, placental BMR; line 3, placental FMR; line 4, marsupial FMR; line 5, 'athletic' mammal MMR. Allometric equations for the relationships of these levels of metabolic rate to  $M_b$  are shown in Table 5. The measured values of BMR, FMR and MMR for three species of marsupial are also shown: *S. crassicaudata* (circles), BMR data from Dawson and Hulbert (1970), FMR from Nagy et al. (1988), MMR from the present study; *B. penicillata* (squares), BMR from Webster and Dawson (2003), FMR from Nagy (1994), MMR from Seeherman et al. (1981); and *M. rufus* (triangles), BMR from Dawson et al. (2000a), FMR from Munn et al. (2008), MMR from Dawson et al. (2004).

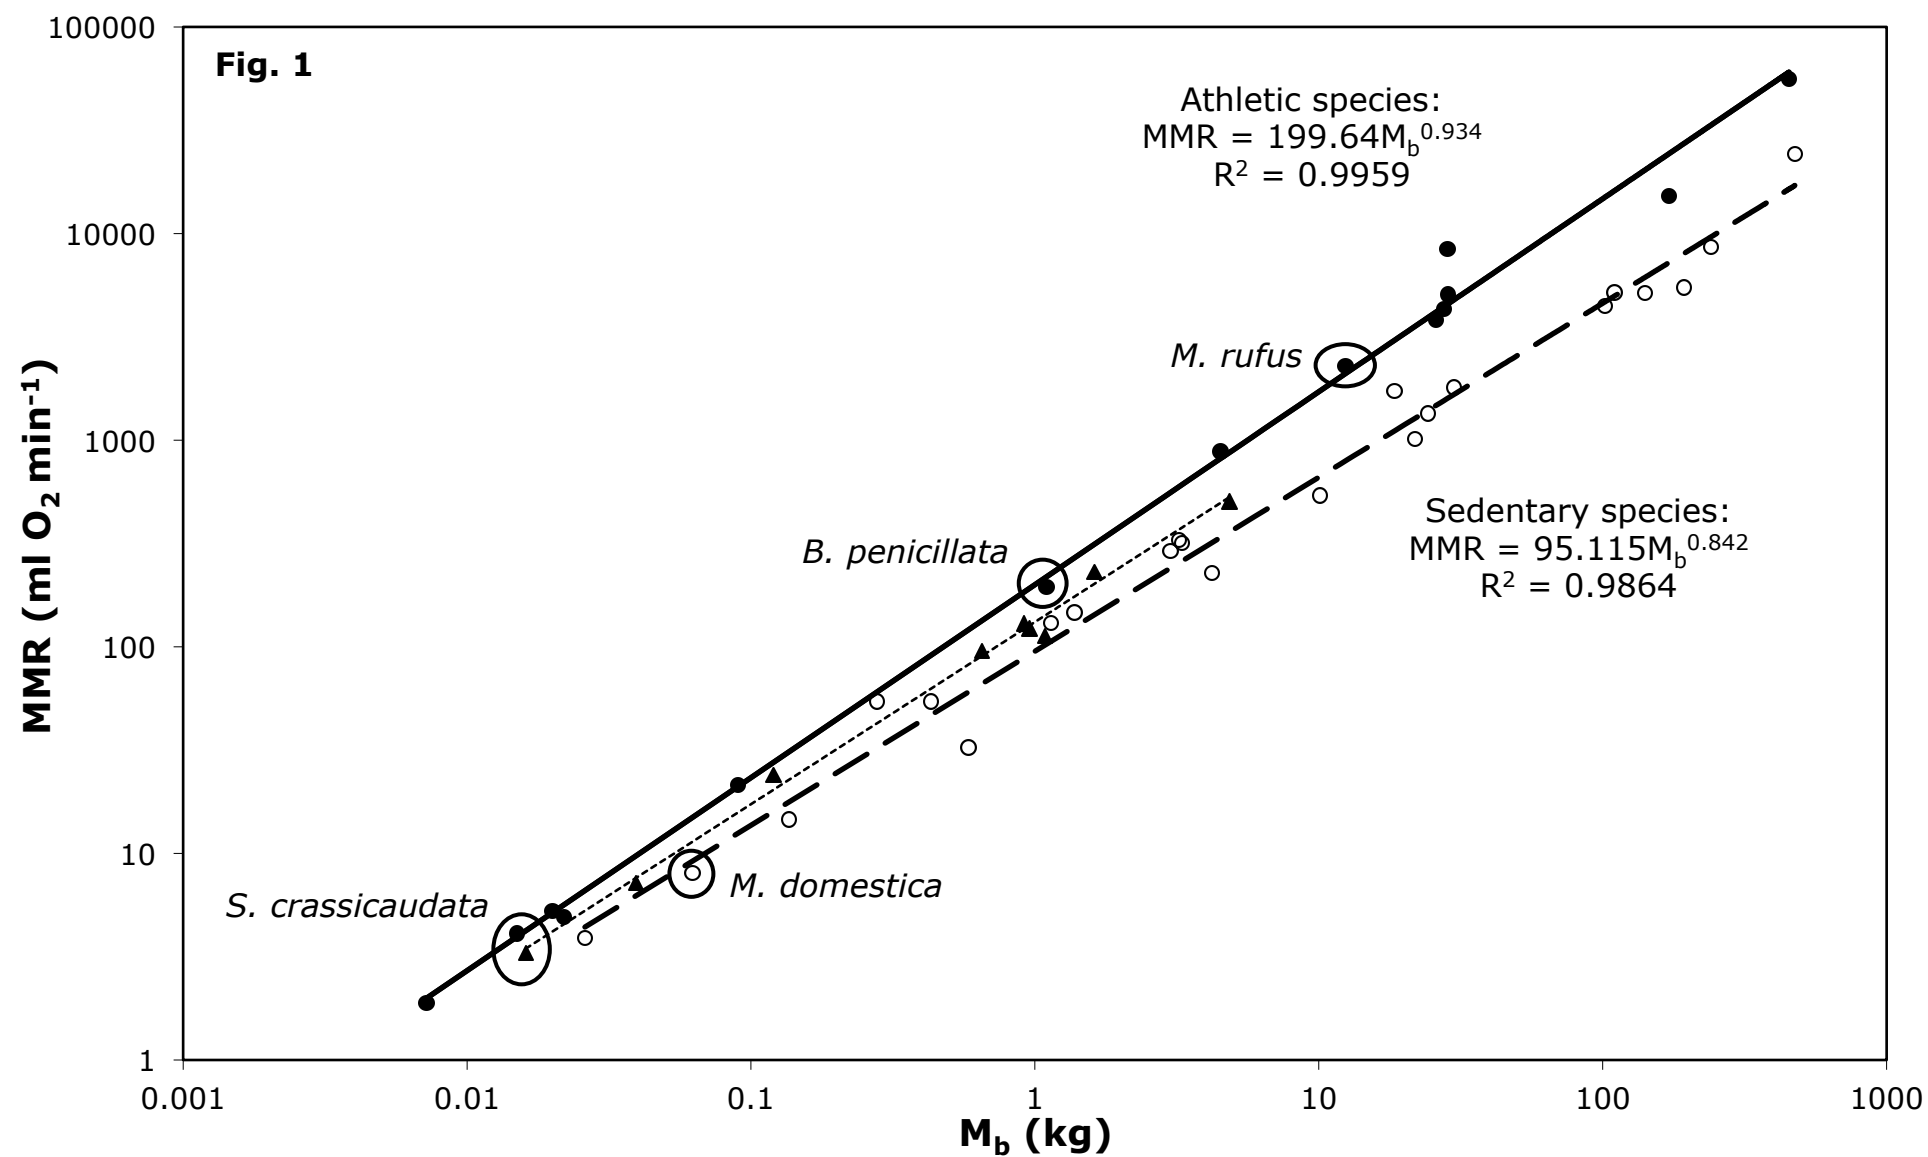

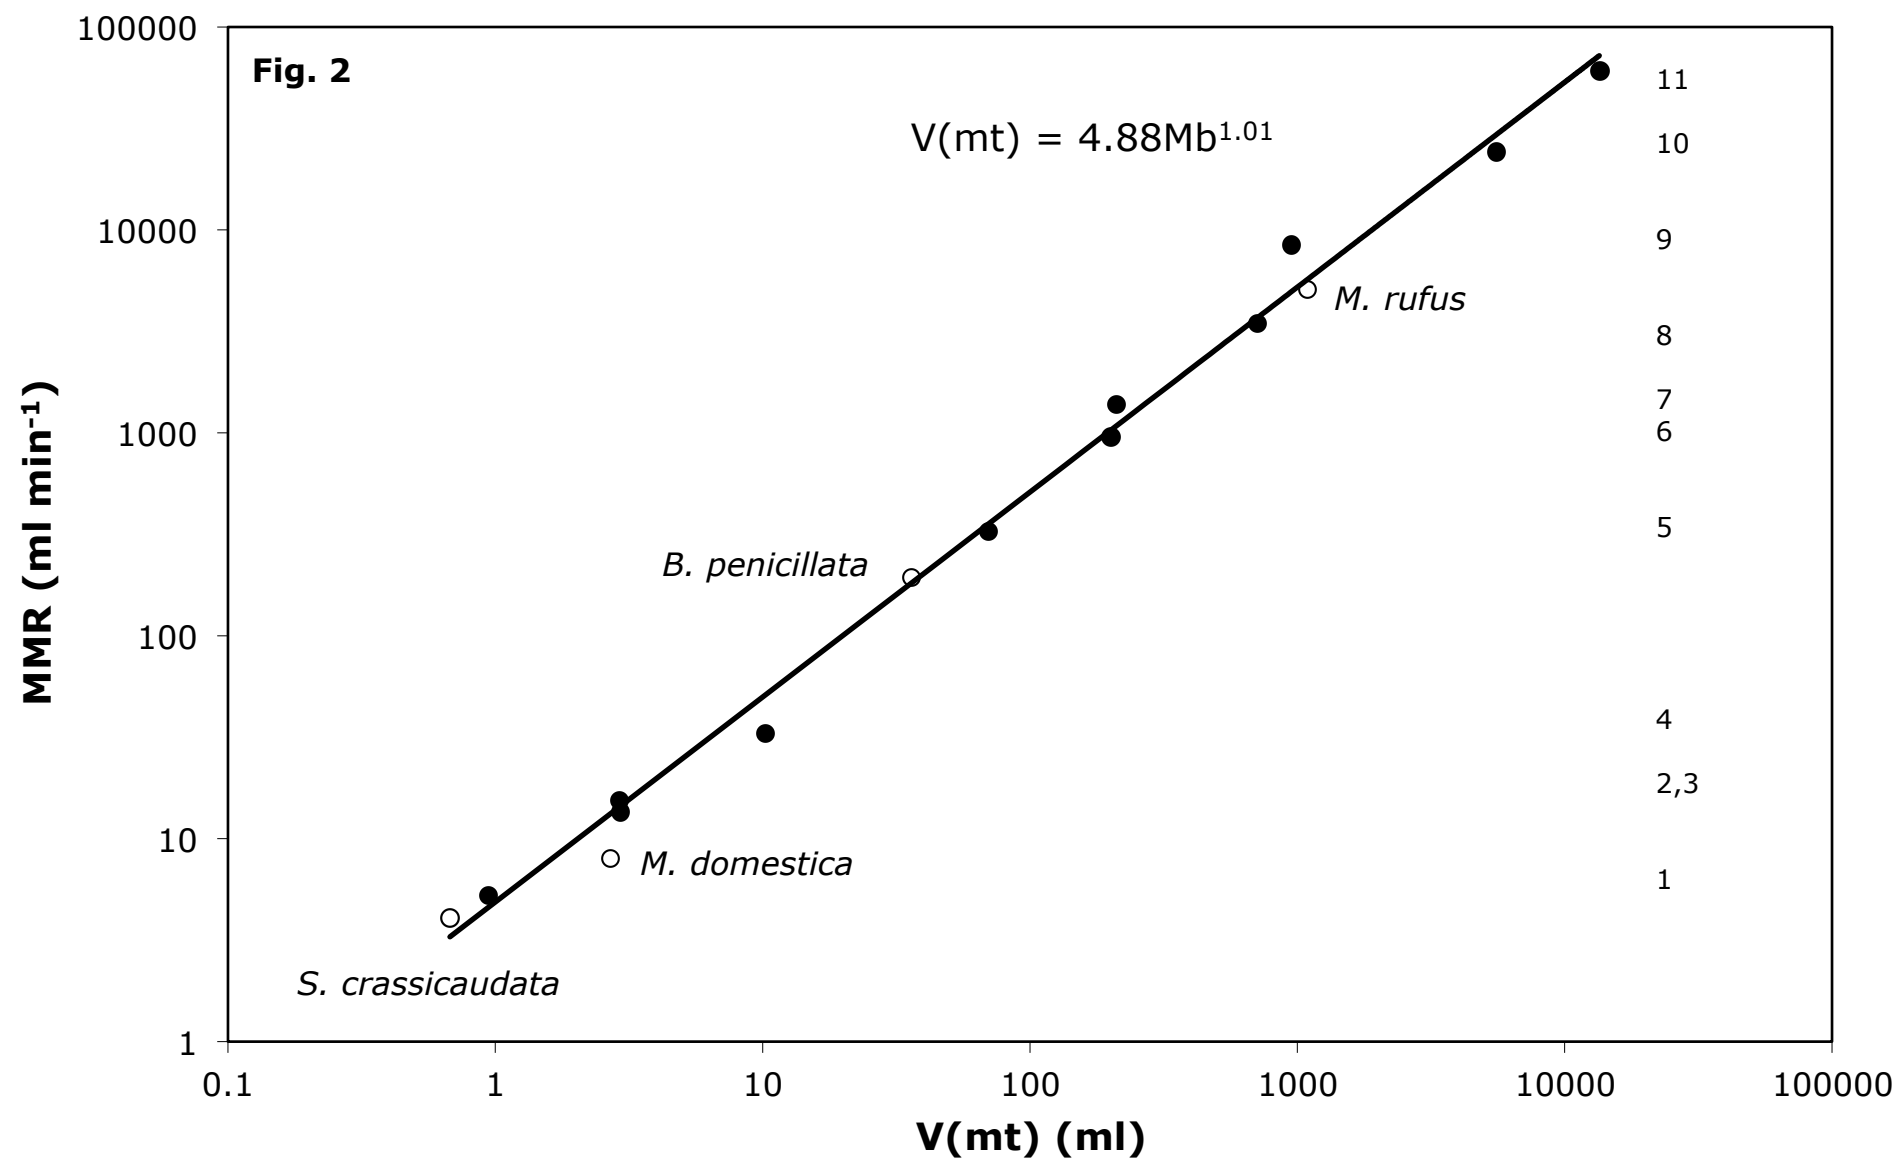

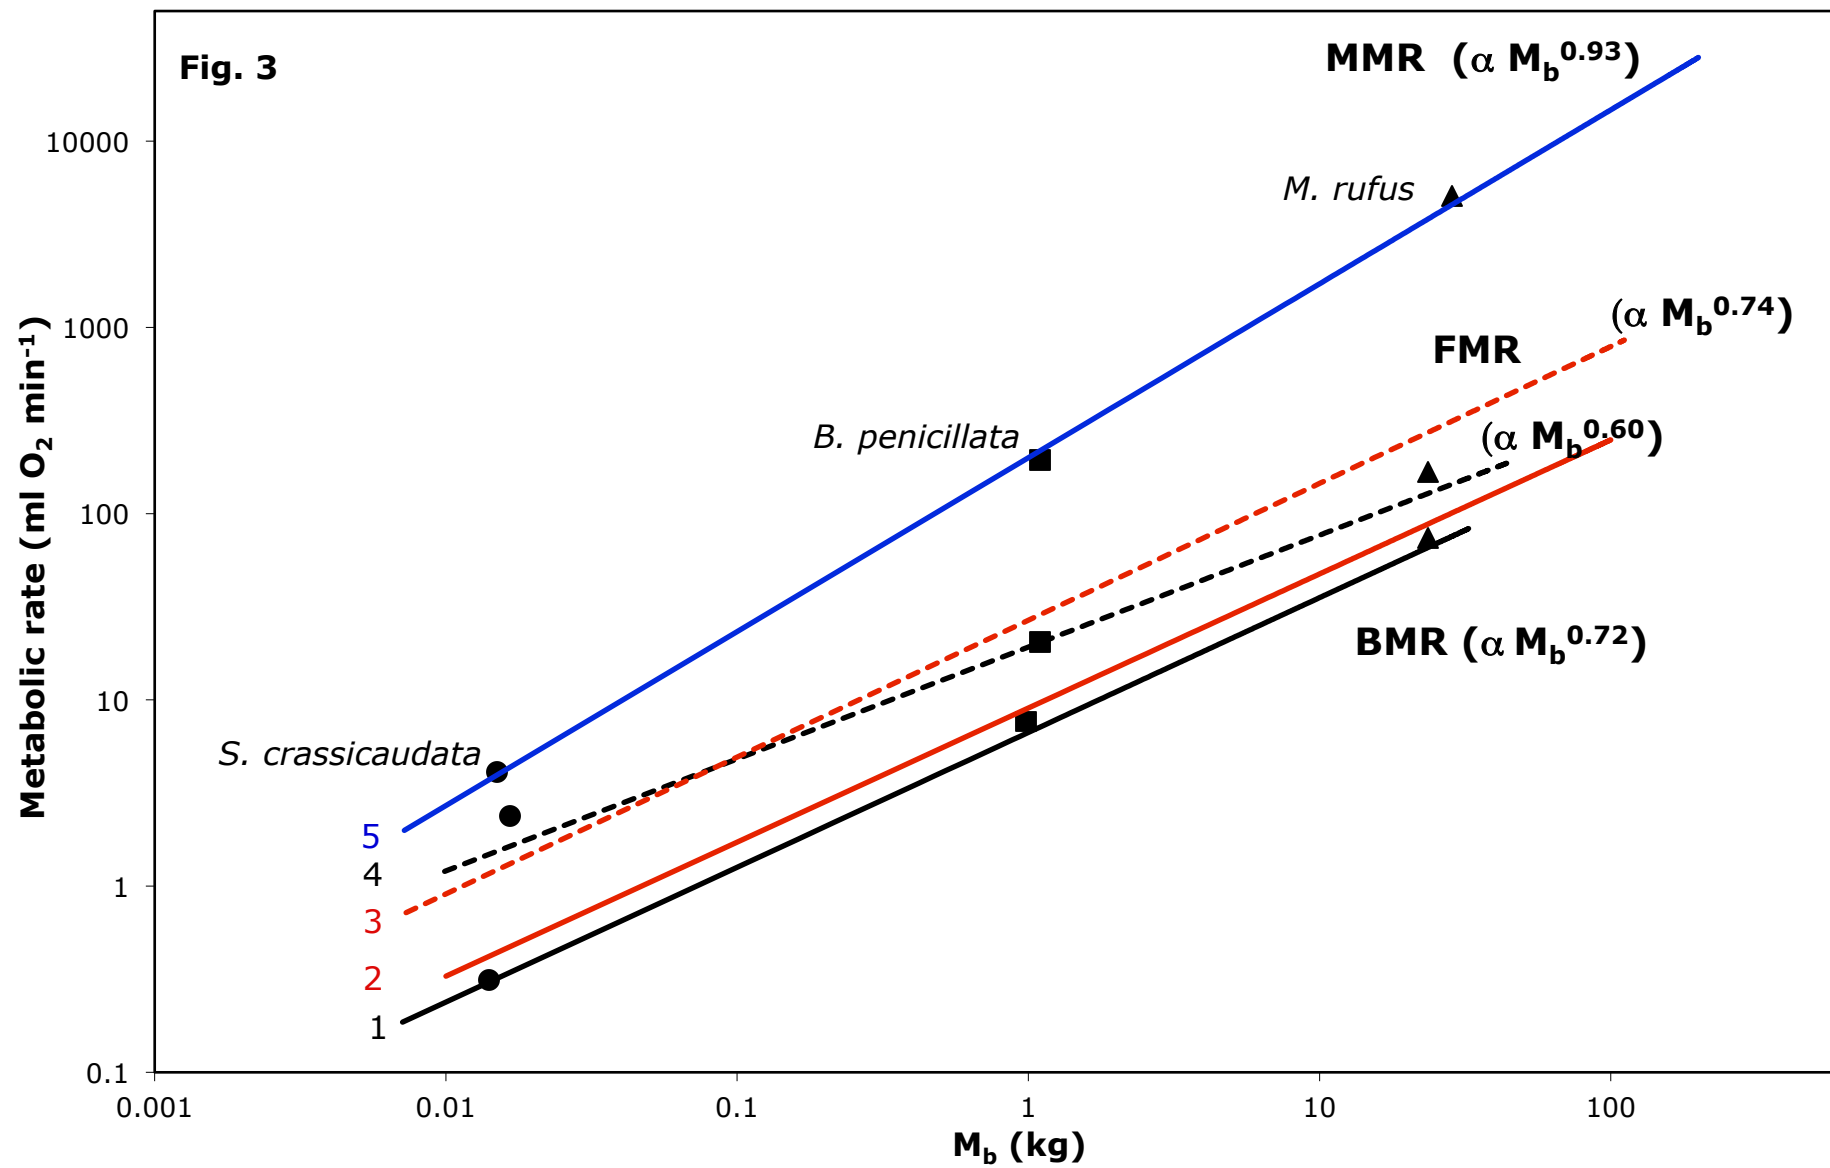

Source: https://cob.silverchair.com/jeb/article-pdf/doi/10.1242/jeb.079087/2036101/jeb_079087.pdf
